# Supplementary material for: A stimuli-responsive viologen-containing polymer for use in electrochromic devices and amine-detecting paper
Source: Royal Society of Chemistry journal article supplement (doi:10.1039/d3nj01572f), 2023-01-01
Supplement: d3nj01572f1.pdf [file d3nj01572f1.pdf]

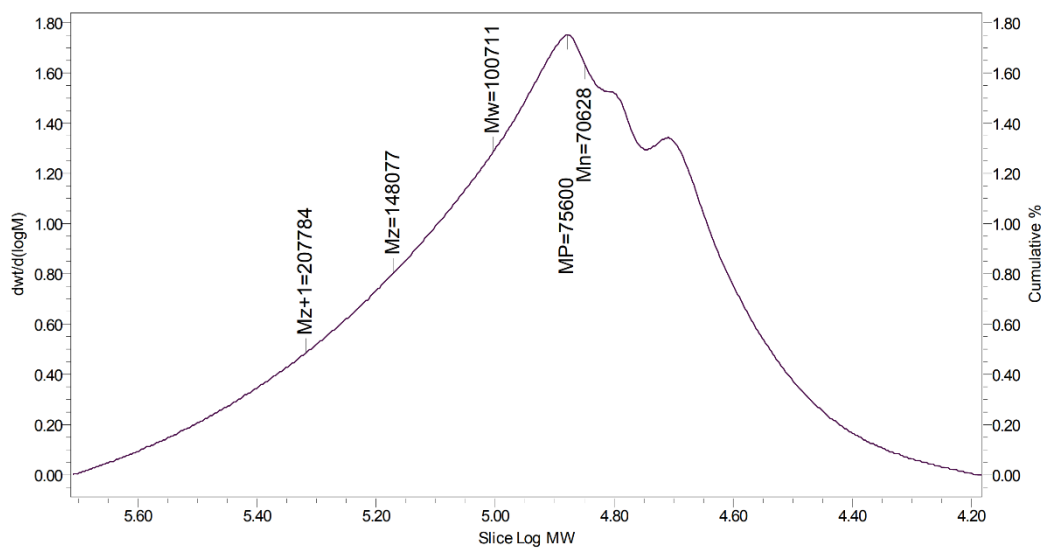

**Figure S1.** The GPC curve for polymer 6-HW.

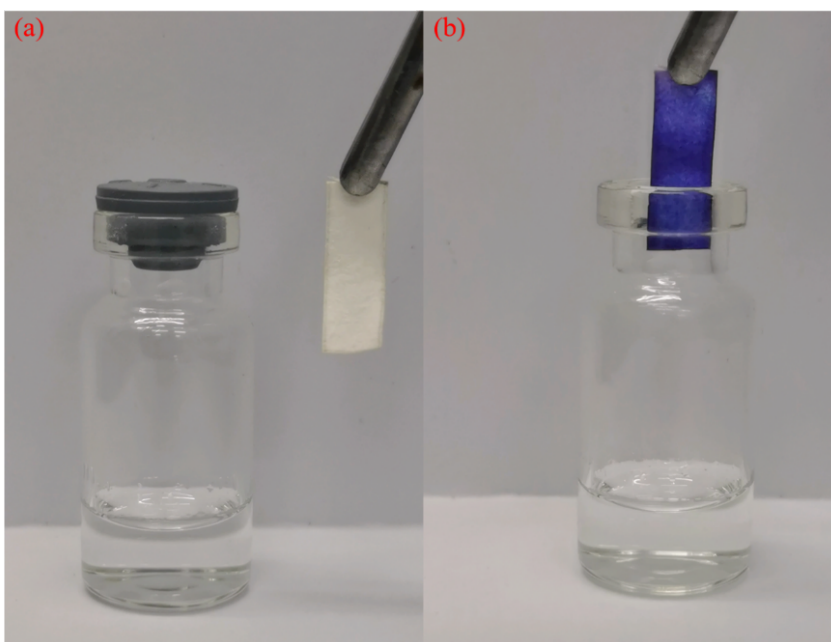

**Figure S2.** The color change properties of test chips with ammonia gas released by amine water.

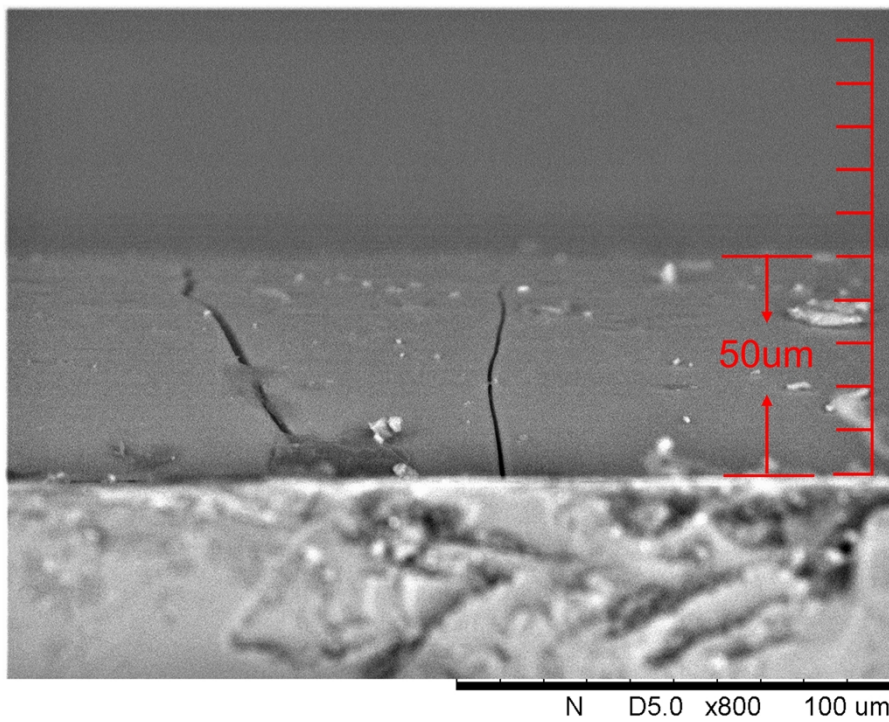

**Figure S3.** The thickness of the polymer **6** film.

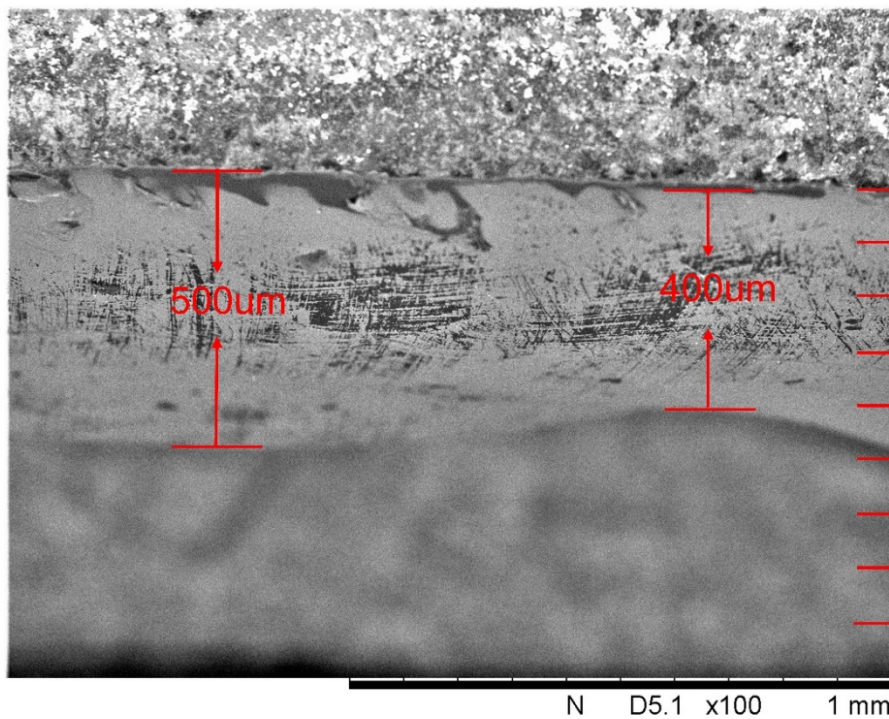

**Figure S4.** The thickness of the electrolyte thin film.
